# Supplementary material for: Droplet-Based Microfluidics as a Platform to Design Food-Grade Delivery Systems Based on the Entrapped Compound Type
Source: MDPI journal article supplement (doi:10.3390/foods12183385), 2023-09-09
Supplement: s1 [file s1]

**Table S1.** Commercial microfluidic devices used to generate emulsion droplets.

| Company  | Brand                                                         | Material                        | Characteristics                                                                                                                                                                     | Applications                                                                                                                                      | References |
|----------|---------------------------------------------------------------|---------------------------------|-------------------------------------------------------------------------------------------------------------------------------------------------------------------------------------|---------------------------------------------------------------------------------------------------------------------------------------------------|------------|
| Dolomite | Telos ® 2 reagent<br>Telos ® 1 reagent<br>3D flow focusing SC | Glass<br>microfluidic<br>device | -The device consists of 7 parallel junctions that can be combined with others 10.<br>-Hydrophilic, hydrophobic, and fluorophilic coating options.<br>-Available at 100 or 50 µm.    | Designed for emulsion generation, foam generation, micro-particle synthesis and high throughput experimentation (for example, analysis of cells). | [1]        |
|          | Telos ® micromixer Chip                                       |                                 | -The device consists of 7 independent micromixer channels on the chip (with 5 mixing stages each).<br>-Hydrophilic and hydrophobic coating options.<br>-Available at 30 or 50 µm.   | Designed to create nano and micro particles and emulsions.                                                                                        |            |
|          | µEncapsulator 2 Reagent Droplet Chip                          |                                 | -Chip size 11.25mm x 15mm x 2mm.<br>-Hydrophilic and fluorophilic coating surface options.<br>-Junction of 100 µm scale.                                                            | Designed for rapid generation of double emulsion droplets (an aqueous core, surrounded by an oil shell)                                           |            |
|          | µEncapsulator Sample Reservoir Chip                           |                                 | -Smooth channel with 100 µL storage volume.<br>-Easy to clean and clear device.<br>-Hydrophilic coating surface.                                                                    | Designed for single emulsion droplet generation.                                                                                                  |            |
|          | Large Droplet Junction Chip                                   | Glass and quartz device         | -Chip offers both a T- and X-junction.<br>-Simple and easy to use.<br>-High droplet production (12,000 per second).<br>-Hydrophilic, hydrophilic and, fluorophilic coating options. | Designed for droplet emulsion generation.                                                                                                         |            |
|          | Small Droplet Junction Chip                                   |                                 | -Chip offers a flow focusing junction geometry with 14 x 17 µm cross-section at the junction.                                                                                       | Designed for generating small droplets in the size range of 5-30 µm,                                                                              |            |

|                       |                         |                                                          |                                                                                                                                                                   |                                                                                                      |     |
|-----------------------|-------------------------|----------------------------------------------------------|-------------------------------------------------------------------------------------------------------------------------------------------------------------------|------------------------------------------------------------------------------------------------------|-----|
|                       |                         |                                                          | -High droplet production (12,000 per second).<br>-Hydrophilic, hydrophilic and, fluorophilic coating options.                                                     | improving control over the targeting and release of active compounds.                                |     |
|                       | T-Junction Chip         |                                                          | -Extremely smooth channel surface.<br>- Excellent chemical compatibility.<br>-Hydrophilic, hydrophilic and, fluorophilic coating options.                         | Designed for a range of applications, including mixing fluids, microreactions and droplet formation. |     |
|                       | 6-Junction Droplet Chip | Glass device                                             | -The device consists of 6 separate flow-focusing junctions.<br>-Excellent chemical compatibility.<br>-Hydrophilic, hydrophilic and, fluorophilic coating options. | Designed for the parallel generation of 20 µm - 60 µm oil-in-water droplets.                         |     |
| Microfluidic ChipShop | Fluidic 162             | Topas® COC (Cyclic olefin copolymer) or Polycarbonate PC | -One channel device.<br>-Lid thickness 140 or 170 µm without surface treatment.                                                                                   | Designed for droplet generation on chip.                                                             | [2] |
|                       | Fluidic 537             |                                                          | -The flow-focusing device consists of 4 identical droplet generation units with a 38 µm nozzle size.                                                              |                                                                                                      |     |
|                       | Fluidic 912             |                                                          | -The flow-focusing device consists of 8 identical droplet generation units with a channel dimension of 80 µm at the droplet formation region.                     |                                                                                                      |     |
|                       | Fluidic 536             |                                                          | -The device consists of double-cross geometry with 37 µm nozzle size and 3 droplet generator units.                                                               | Designed for W/W/O double emulsion generation, allowing cell and particle encapsulation.             |     |
|                       | Fluidic 488             |                                                          | -The device consists of a combination of multiple T-junctions.<br>-Storage module for capturing droplets.<br>-Double cross nozzle type (74 µm).                   | Designed for generating single or multiple emulsions and storage.                                    |     |

|  |              |                           |                                                                                                                                                                                                                           |                                                          |  |
|--|--------------|---------------------------|---------------------------------------------------------------------------------------------------------------------------------------------------------------------------------------------------------------------------|----------------------------------------------------------|--|
|  | Fluidic 285  |                           | -The multi-channel device presents various channels with different nozzle (50; 70; 80; 100 $\mu\text{m}$ ).<br>-The main channel, as well as the entrance channel, vary in diameter, enabling a large set of experiments. | Designed for generating droplets with different volumes. |  |
|  | Fluidic 1196 | Glass microfluidic device | -Several parallel microchannels in one unit.<br>-Lid thickness of 250 $\mu\text{m}$ -Channel dimensions 20 $\mu\text{m}$                                                                                                  | Designed for droplet generation on chip.                 |  |

**Table S2.** Technological approaches and properties of the delivery systems based on food-grade emulsions assembled by microfluidic techniques.

| Emulsion type-Delivery system | Aqueous phase                                                                                        | Oil phase                        | Process conditions                                        | Bioactive                     | Delivery system characterization                                                                                                                                                      | Microfluidic device type                                                                                                                                                                                       | Reference |
|-------------------------------|------------------------------------------------------------------------------------------------------|----------------------------------|-----------------------------------------------------------|-------------------------------|---------------------------------------------------------------------------------------------------------------------------------------------------------------------------------------|----------------------------------------------------------------------------------------------------------------------------------------------------------------------------------------------------------------|-----------|
| O/W- Emulsion                 | Modified lecithin (ML), whey protein isolate (WPI), or Tween 20 (0.05-3 wt%)                         | Medium chain triacylglycerol oil | $Q_d = 0.1\text{-}10$ mL/h<br>$Q_c = 100\text{-}500$ mL/h | Fucoxanthin extract (0-4 wt%) | Size= $30.3 \pm 0.2$ $\mu\text{m}$ (ML), $32.3 \pm 0.1$ $\mu\text{m}$ (WPI) and $29.0 \pm 0.8$ $\mu\text{m}$ (Tween 20)<br>DI= 0.5<br>EE= 100%(ML)<br>90.7% (WPI)<br>50.4% (Tween 20) | Silicon $24 \times 24$ mm <sup>2</sup> microchannels array chip (Model: WMS 11-1; EP. Tech Co., Ltd., Hitachi, Japan)<br>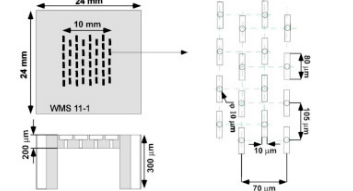 | [3]       |
|                               | Tween 20 (1% w/w), sodium salt of colic acid (Na-cholate), decaglycerol monolaurate, polyglyceryl-5- |                                  | $J_d = 10\text{-}300$ L/m.h                               | Quercetin (0.1-0.6 mg/mL)     | Size= 28-29 $\mu\text{m}$<br>DI < 0.21<br>EE= 80 % (4 °C) and 70 % (25 °C)                                                                                                            | Silicon $24 \times 24$ mm <sup>2</sup> microchannels array chip (Model WMS 1-2; EP. Tech Co., Ltd., Hitachi, Japan)<br>   | [4]       |

|              |                                                                                                                                                                |                                               |                             |                                                                                                                                |                                                                                                                                  |                                                                                                                    |     |
|--------------|----------------------------------------------------------------------------------------------------------------------------------------------------------------|-----------------------------------------------|-----------------------------|--------------------------------------------------------------------------------------------------------------------------------|----------------------------------------------------------------------------------------------------------------------------------|--------------------------------------------------------------------------------------------------------------------|-----|
|              | laurate (Sunsoft A-12E), or bovine serum albumin (BSA) (1% w/w)                                                                                                |                                               |                             |                                                                                                                                |                                                                                                                                  |                                                                                                                    |     |
|              | Decaglycerol monolaurate (ML-750) or Tween 20 (1% w/w)                                                                                                         |                                               |                             |                                                                                                                                |                                                                                                                                  |                                                                                                                    |     |
|              | Sodium dodecyl sulfate (SDS), decaglycerol monolaurate (ML-750), decaglycerol monooleate (MO-7S), sodium casinate (Na-Cs), and modified lecithin (ML) (1% w/w) |                                               |                             |                                                                                                                                |                                                                                                                                  |                                                                                                                    |     |
| O/W-Microgel | Sodium alginate (1 wt%), gelatin (5 wt%), and EDTA-Ca (2 wt%)                                                                                                  | Tert-butyl hydroquinone (TBHQ)                | $Q_d = 1\text{--}14$ mL/h   | $\beta$ -sitosterol (0.5–4.0% w/w) and $\gamma$ -oryzanol (0.5–4.0% w/w)                                                       | Size= 26–28 $\mu\text{m}$<br>DI < 0.20<br>EE over 80 %                                                                           | Silicon $24 \times 24 \text{ mm}^2$ microchannels array chip (Model: WMS 11–1; EP. Tech Co., Ltd., Hitachi, Japan) | [5] |
|              |                                                                                                                                                                |                                               | $Q_d = 0.25\text{--}5$ mL/h | AstaReal® (AR, astaxanthin purity 20%), Zanthin® (ZA, astaxanthin purity 10%), and Astaxanthin >97% (Sigma-Aldrich) (1–5% w/w) | Size= 35–37 $\mu\text{m}$<br>DI < 0.25<br>EE over 98 %                                                                           | 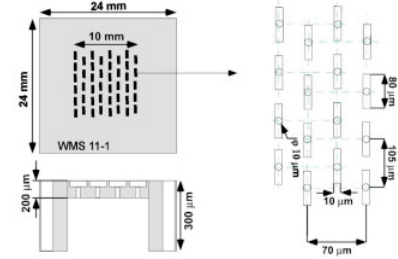                                | [5] |
|              | Poly (vinyl alcohol) (PVA) (0.25% w/v)                                                                                                                         | PLGA 7525A dissolved in dichloromethane (DCM) | -                           | Finasteride (28 mg, monthly doses)                                                                                             | Size around 30 $\mu\text{m}$<br>DI= 23–28%<br>EE= not specified<br>CR= an initial burst, a moderate release, and then a plateau. | Photosensitive resin microfluidic device made using microscale 3D printing equipment                               | [6] |
|              | Poly (vinyl alcohol) (PVA) (0.25% w/v)                                                                                                                         | PLGA 5050A (PURASORB® PDLG 5002A),            | $P_d = 1,100$ mbar          |                                                                                                                                | Size= 40 $\mu\text{m}$ (PLGA 7502A or 5002A) and                                                                                 |                                | [7] |
|              |                                                                                                                                                                |                                               |                             |                                                                                                                                |                                                                                                                                  |                               | [7] |

|                  |                                                |                                                                                                      |                                                                                                  |                                            |                                                                                                                                             |                                                                                                                                            |      |
|------------------|------------------------------------------------|------------------------------------------------------------------------------------------------------|--------------------------------------------------------------------------------------------------|--------------------------------------------|---------------------------------------------------------------------------------------------------------------------------------------------|--------------------------------------------------------------------------------------------------------------------------------------------|------|
|                  |                                                | PLGA 7525A (PURASORB® PDLG 7502A), and PLA02A (PURASORB® PDL 02A) dissolved in dichloromethane (DCM) | $P_c = 2,200$ mbar                                                                               |                                            | around $30\ \mu\text{m}$ (PLGA/PLA02A)<br>DI= 0.28 and 0.16<br>EE > 96.5%                                                                   |                                                                                                                                            |      |
| O/W-Nanoparticle | D1: acetone or methanol<br>D2: deionized water | 3M fluorinated™ Fluid (FC-40)                                                                        | $Q_c = 10$ to $250\ \mu\text{L}/\text{min}$ .<br>$Q_d =$ fixed at $50\ \mu\text{L}/\text{min}$ . | Itraconazole (ITZ) nanoparticles (1 mg/mL) | Size= the volume was calculated and range from 1 to $6\ \mu\text{L}$ .<br>EE= encapsulation was confirmed by the increase of particle size. | 316 stainless steel metal T-junction devices<br>(a)<br>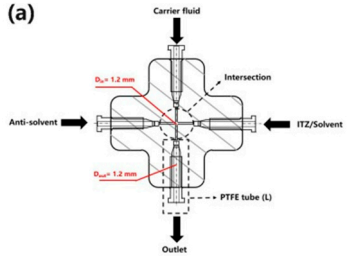 | [8]  |
|                  | Poly (vinyl alcohol) (PVA; 1% w/v) solution    | PLGA (13.4 mg/mL) in acetonitrile (ACN)                                                              | Total flow rate: 2-12 mL/min<br>Flow rate ratio= 2:1 to 10:1, aqueous:oil phases                 | Rutin (10 mg/mL)                           | Size= $123.4\ \text{nm}$<br>DI= $0.16 \pm 0.005$<br>EE= $34 \pm 2\%$                                                                        | NanoAssemblr® Benchtop Device<br>                      | [9]  |
|                  | Water                                          | Tween 20 dissolved in ethyl acetate                                                                  | $P_c = 4.20$ bar<br>$P_d = 3.81$ bar<br>For the smallest particle size                           | Fenofibrate (0.5 %wt)                      | Size < $1\ \mu\text{m}$<br>DI= not specified                                                                                                | Glass microfluidic device<br>                         | [10] |
| O/W/O-           | Middle phase: an aqueous solution              | Outer phase: soybean oil,                                                                            | $Q_i = 2.2\ \mu\text{L}/\text{h}$ .                                                              | Thyme essential oil and lavender           | Size= $182\text{--}342\ \mu\text{m}$<br>DI= 2.4-2.8%                                                                                        | Glass microfluidic device                                                                                                                  | [11] |

|                         |                                                                                                                                                    |                                                                                                                                                                           |                                                                                                        |                                                   |                                                               |                                                                                       |      |
|-------------------------|----------------------------------------------------------------------------------------------------------------------------------------------------|---------------------------------------------------------------------------------------------------------------------------------------------------------------------------|--------------------------------------------------------------------------------------------------------|---------------------------------------------------|---------------------------------------------------------------|---------------------------------------------------------------------------------------|------|
| Core-shell microcapsule | containing $\text{CaCl}_2$ ( $100 \times 10^{-3} \text{ M}$ ), disodium-EDTA ( $100 \times 10^{-3} \text{ M}$ ) and sodium alginate (2.0%; pH 7.0) | acetic acid (5% w/v) and PGPR (5.0% w/v)<br><i>Inner phase:</i> soybean oil, benzyl benzoate (1:1), and PGPR (2.0% w/v)                                                   | $Q_m = 5.0 \mu\text{L/h}$ .<br>$Q_o = 68.1 \mu\text{L/h}$                                              | essential oil (33.33% v/v)                        | EE= not specified                                             | 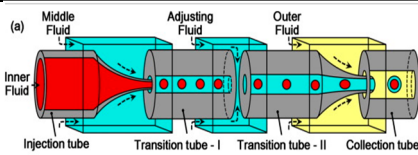    |      |
| W/O/W- Giant liposome   | <i>Outer phase:</i> poly (vinyl alcohol) (PVA; 10 % w/v)<br><i>Inner phase:</i> PVA (1% w/v) and dextran (9% w/v)                                  | <i>Middle phase:</i> soybean lecithin (0.5% w/v) in the following organic solvent mixtures (1:1.8 v/v): chloroform/hexane; ethyl acetate/hexane or ethyl acetate/pentane. | $Q_i = 1000 \mu\text{L/h}$<br>$Q_m = 1000 \mu\text{L/h}$<br>$Q_o = 3,000\text{--}12,000 \mu\text{L/h}$ | $\beta$ -carotene (0.125% w/v)                    | Size= 100-180 $\mu\text{m}$<br>DI= 3-6 %<br>EE= not specified |    | [12] |
| W/O-Microgel            | Pectin solution (0.5 and 1% w/w)                                                                                                                   | Acetic acid and $\text{CaCO}_3$ in rapeseed oil                                                                                                                           | $Q_d = 1 \text{ mL/h}$<br>$Q_c = 9 \text{ mL/h}$                                                       | Silver and gold nanoparticles (5.5 nm; 1.5 mg/mL) | The microgel was able to encapsulate nanoparticles            |   | [13] |
|                         | Gellan gum (0.10–0.30% w/w) and <i>Jabuticaba</i> extract (diluted in 0.025 M potassium chloride pH 1 and 0.4 M sodium acetate pH 4.5)             | PGPR (4% w/w) and calcium acetate (1% w/w) added to the soybean oil                                                                                                       | $Q_d = 2\text{--}30 \text{ mL/h}$<br>$Q_c = 150\text{--}250 \text{ mL/h}$                              | <i>Jabuticaba</i> extract (10-30% v/v)            | Size= 185-342 $\mu\text{m}$<br>DI= 0.016 and 0.086            |  | [14] |

|                |                                                                                                                                                                                                                    |                                                                                                                                                   |                                                                                                                                                                                                                  |                                                                                                                                           |                                                                                                                                                                                  |                                                                                                                                                                                                                            |      |
|----------------|--------------------------------------------------------------------------------------------------------------------------------------------------------------------------------------------------------------------|---------------------------------------------------------------------------------------------------------------------------------------------------|------------------------------------------------------------------------------------------------------------------------------------------------------------------------------------------------------------------|-------------------------------------------------------------------------------------------------------------------------------------------|----------------------------------------------------------------------------------------------------------------------------------------------------------------------------------|----------------------------------------------------------------------------------------------------------------------------------------------------------------------------------------------------------------------------|------|
|                | <p>1: Dextran or protein aqueous solutions</p> <p>2: Alginate solution (2% wt%) containing <math>\text{CaCO}_3</math> (200 mM). poly(ethyleneimine) (PEI; 0.3 wt%) or chitosan (1% v/v in acetic acid) coating</p> | <p>3: Mineral oil with Span 80 (3 wt%), used as oil phase A</p> <p>4: Mineral oil with Span 80 and acetic acid (0.2% v/v) used as oil phase B</p> | <p><math>Q_1 = 15 \mu\text{L}/\text{min}</math></p> <p><math>Q_2 = 0.5 \mu\text{L}/\text{min}</math></p> <p><math>Q_3 = 10 \mu\text{L}/\text{min}</math></p> <p><math>Q_4 = 14 \mu\text{L}/\text{min}</math></p> | Ovalbumin                                                                                                                                 | <p>Size around <math>100 \mu\text{m}</math></p> <p>DI= not specified</p> <p>EE= 88% (PEI coating) and 80% (chitosan coating)</p>                                                 | <p>Polydimethylsiloxane (PDMS) microfluidic device (four inlets and one outlet)</p> 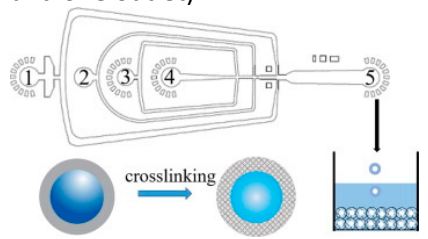                                                    | [15] |
|                | <p>Alginate (2% w/v) and recombinant proteins in water</p> <p><i>Collection bath:</i> chitosan (0.5%) and <math>\text{CaCl}_2</math> (0.1%)</p>                                                                    | Span 80 in mineral oil                                                                                                                            | <p><math>Q_d = 10 \mu\text{L}/\text{h}</math></p> <p><math>Q_c = 50 \mu\text{L}/\text{h}</math></p>                                                                                                              | eGFP+AvrA nanoparticles (2% w/v)                                                                                                          | <p>Size= <math>339 \pm 52 \mu\text{m}</math></p> <p>DI= <math>0.352 \pm 0.153</math></p> <p>EE= not specified</p> <p>CR= 70 % of the encapsulated was released after 240 min</p> | <p>Polydimethylsiloxane (PDMS) microfluidic device</p>                                                                                                                                                                     | [16] |
|                | <p>Pectin (1 wt%)</p> <p>Sheath flow: <math>\text{CaCl}_2</math> solution (1 wt%)</p>                                                                                                                              | <p>Mineral oil solution containing quercetin nanoparticles and retinyl palmitate, and Tween 80 (1 wt%)</p>                                        | <p><math>Q_d = 0.5 \mu\text{L}/\text{min}</math></p> <p><math>Q_c = 4.0 \mu\text{L}/\text{min}</math></p> <p><math>Q_{\text{sheath}} = 30 \mu\text{L}/\text{min}</math></p>                                      | <p>Quercetin nanoparticles (0.02 wt%) and retinyl palmitate (0.2 wt%)</p>                                                                 | <p>Size around <math>67.3\text{--}93.1 \mu\text{m}</math></p> <p>DI= not specified</p> <p>EE= not specified, encapsulation confirmed by fluorescence</p>                         | <p>Polydimethylsiloxane (PDMS) microfluidic device</p>                                                                                  | [17] |
| W/O/W-Emulsion | <p><i>Inner phase:</i> phosphate buffer solution (100 mmol/L) containing betanin and D-glucose (1% w/w)</p> <p><i>Outer phase:</i> Tween 20 in water</p>                                                           | <p><i>Middle phase:</i> soybean oil and tetraglycerin monolaurate condensed ricinoleic acid ester (CR-310)</p>                                    | <p><math>J_d = 5\text{--}100 \text{ L}/\text{m.h}</math></p>                                                                                                                                                     | E162, (mixture of beetroot extract and maltodextrin; 0.4% w/w betanin, TCI/ABCr), betanin, and spray dried beetroot juice) (0.1-1.0% w/w) | <p>Size &lt; <math>50 \mu\text{m}</math></p> <p>DI &lt; <math>0.26 \pm 0.01</math></p>                                                                                           | <p>Silicon <math>24 \times 24 \text{ mm}^2</math> microchannels array chip (Model: WMS 11-1; EP. Tech Co., Ltd., Hitachi, Japan)</p>  | [18] |

|                                  |                                                                                                                                                                 |                                                                              |                                                                                                                                     |                                                                                |                                                                                                                                                                                             |                                                                                                                                           |      |
|----------------------------------|-----------------------------------------------------------------------------------------------------------------------------------------------------------------|------------------------------------------------------------------------------|-------------------------------------------------------------------------------------------------------------------------------------|--------------------------------------------------------------------------------|---------------------------------------------------------------------------------------------------------------------------------------------------------------------------------------------|-------------------------------------------------------------------------------------------------------------------------------------------|------|
| W/O/W- Solid lipid microparticle | <i>Outer phase:</i> water and polyvinyl alcohol (PVA; 10% (w/v)<br><i>Inner phase:</i> Ascorbic acid solution with or without CaCl <sub>2</sub> , and chitosan. | <i>Middle phase:</i> palm fat oil                                            | $Q_i = 3,000$ and $1,000 \mu\text{L/h}$ .<br>$Q_m = 2,500$ and $3,000 \mu\text{L/h}$ .<br>$Q_o = 14,000$ and $12,000 \mu\text{L/h}$ | Ascorbic acid (3-20% w/w)                                                      | Size= 195- 342 $\mu\text{m}$<br>DI= 73-95 %<br>EE= 73-95 %<br>CR decreased around 50% after 30 days                                                                                         | Glass microfluidic device<br>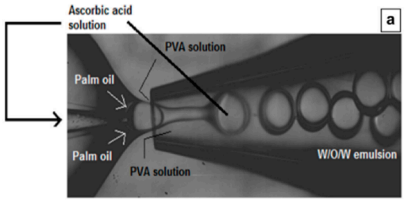                          | [19] |
| W/O/W- Microcapsule              | <i>Outer phase:</i> aqueous solution and PVA<br><i>Inner phase:</i> aqueous mesoporous silica nanoparticles (MSN) + Rhodamine B (RB) solution                   | <i>Middle phase:</i> PLGA oil                                                | $Q_i = 1 \text{ mL/h}$ .<br>$Q_m = 2 \text{ mL/h}$ .<br>$Q_o = 4 \text{ mL/h}$                                                      | Mesoporous silica nanoparticles (MSN; 40% w/v) + Rhodamine B (RB; 10-500 mg/L) | Size= 119 nm (MSN) and 56 $\mu\text{m}$ (PLGA-MSN)<br>DI= 4.91%<br>EE around 88% for PLGA-MSN and 95% for PLGA<br>CR around 96% after 120 days for PLGA-MSN and 97% after 120 days for PLGA | Polymethyl methacrylate (PMMA) microfluidic device<br> | [20] |
|                                  | <i>Outer phase:</i> Poly (vinyl alcohol) (PVA) aqueous solution (2 wt%)<br><i>Inner phase:</i> Poly (vinyl alcohol) (PVA) aqueous solution                      | <i>Middle phase:</i> PLGA (0.6 wt%) in dichloromethane )                     | $Q_i = 1000 \mu\text{L/min}$<br>$Q_m = 2000 \mu\text{L/min}$<br>$Q_o = 4000 \mu\text{L/h}$                                          | 2-[[[4-phenoxyphenyl]sulfonyl]methyl]-thiirane (SB-3CT; 0.5 mg/mL)             | Size= 35-65 $\mu\text{m}$<br>DI= 3%<br>EE= 99%                                                                                                                                              | Glass microfluidic device<br>                         | [21] |
|                                  | <i>Middle phase:</i> poly (N-isopropyl acrylamide) (PNIPAM)                                                                                                     | <i>Inner phase:</i> soybean oil solution added with camptothecin (0.4 mg/mL) | $Q_o = 1600-2400 \mu\text{L/min}$<br>$Q_m = 130-210 \mu\text{L/min}$<br>$Q_i = 20-100 \mu\text{L/min}$                              | Doxorubicin hydrochloride and camptothecin (2 mg/mL)                           | Size= 600-1000 $\mu\text{m}$<br>DI= not specified<br>EE= not specified<br>CR= burst process                                                                                                 | Glass microfluidic device                                                                                                                 | [22] |

|  |  |                                         |  |  |  |  |  |
|--|--|-----------------------------------------|--|--|--|--|--|
|  |  | Outer phase:<br>soybean oil and<br>PGPR |  |  |  |  |  |
|--|--|-----------------------------------------|--|--|--|--|--|

\* $Q_c$ : continuous phase flow rate;  $Q_d$ : disperse phase flow rate;  $Q_i$ : inner phase flow rate;  $Q_m$ : middle phase flow rate;  $Q_o$ : outer phase flow rate;  $J_d$ : disperse phase flux;  $P_d$ : disperse phase pressure;  $P_c$ : continuous phase pressure; Tween 20: polyoxyethylene (20) sorbitan monolaurate; EDTA-Ca: ethylenediaminetetraacetic acid calcium disodium salt hydrate; PGPR: polirricinoleato de poliglicerol;  $CaCl_2$ : calcium chloride;  $CaCO_3$ : calcium carbonate; PLGA: poly-lactic-co-glycolic acid; DI: dispersity index; EE: encapsulation efficiency; CR: compound release.

**Table S3.** Trends in droplet-based microfluidics approaches for fabricating delivery systems based on emulsions.

| Emulsion type | Continuous phase                       | Disperse phase                                | Surfactant            | Microfluidic device type                                 | Process conditions                           | Microfluidic device design                                                            | Reference |
|---------------|----------------------------------------|-----------------------------------------------|-----------------------|----------------------------------------------------------|----------------------------------------------|---------------------------------------------------------------------------------------|-----------|
| O/W emulsion  | Aqueous surfactant solution            | Palm oil                                      | Span 20               | Combination of ultrasound and silicon/epoxy microchannel | $Q_d$ and $Q_c = 4$ mL/min                   | 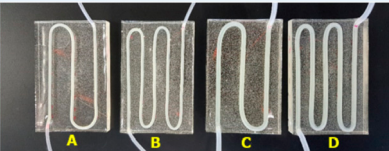   | [23]      |
|               | Xanthan gum or poloxamer in water      | Sunflower oil                                 | Tween 80 or Precirol™ | Microsystem at High Throughput (MHT)                     | $Q_d = 20.8-95.2$ mL/min $Q_c = 500$ mL/min. |    | [24]      |
|               | Argan by-products extract              | Soybean oil                                   | Tween 80              | Silicon                                                  | $Q_d = 2$ mL/h                               |   | [25]      |
|               | Mineral oil and glutaraldehyde (5 %wt) | Chitosan (2 %wt) in hydrochloric acid (1 %wt) | Span 80 (3 %wt)       | PDMS microfluidic device                                 | $Q_d$ and $Q_c = 100$ to $500 \mu\text{L/h}$ |  | [26]      |

|              |                                            |                                                                                         |                               |                           |                                                                                     |                                                                                       |      |
|--------------|--------------------------------------------|-----------------------------------------------------------------------------------------|-------------------------------|---------------------------|-------------------------------------------------------------------------------------|---------------------------------------------------------------------------------------|------|
|              |                                            |                                                                                         |                               |                           |                                                                                     | 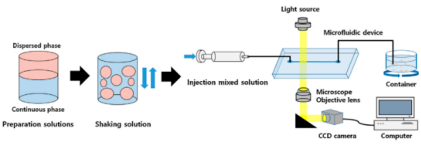   |      |
|              | Silicon oil and surfactant                 | Deionized water                                                                         | Span 80 (1% w/v)              | Photosensitive resin Gr   |                                                                                     |    | [27] |
|              | Water and PEG 2000                         | Sunflower oil                                                                           | Tween 20                      | Glass microfluidic device | $Q_d$ and $Q_c = 20$ to $280 \mu\text{L}/\text{min}$                                | -                                                                                     | [28] |
| W/O emulsion | Sunflower oil and surfactant               | Whey protein isolated (WPI)                                                             | PGPR                          | Glass microfluidic device | Pressure ranged from 0-200 mbar for both phases                                     |    | [29] |
|              | Fluorocarbon oil (HFE 7500) and surfactant | PPGDA:Dextran (20% w/w)<br>Dextran and PPGDA:PPGA (1:3 in 300 $\mu\text{L}$ of ethanol) | Fluorosurfactant 008 (2% w/w) | PDMS microfluidic device  | $Q_d = 60 \mu\text{L}/\text{h}$ for PPGDA and $30 \mu\text{L}/\text{h}$ for dextran |   | [30] |
|              | Deionized water and surfactant             | Mixture of mineral oil and heptane (50:50).                                             | PVA (2% w/w).                 | Photosensitive resin Gr   | $Q_d$ and $Q_c = 100$ to $500 \mu\text{L}/\text{h}$                                 |  | [27] |

|                |                                                                   |                                                                                                                                            |                                                                     |                           |                                                                                                                    |                                                                                       |      |
|----------------|-------------------------------------------------------------------|--------------------------------------------------------------------------------------------------------------------------------------------|---------------------------------------------------------------------|---------------------------|--------------------------------------------------------------------------------------------------------------------|---------------------------------------------------------------------------------------|------|
| W/O/W emulsion | <i>Outer phase:</i><br>glycerol (5% w/v)                          | <i>Inner phase:</i><br>glycerol (50% w/v) in water<br><i>Middle phase:</i><br>middle chain triglyceride (MCT)                              | PGPR in MCT                                                         | Glass microfluidic device | $Q_i = 1-5 \text{ mL/h}$<br>$Q_m = 4-14 \text{ mL/h}$<br>$Q_o = 50-400 \text{ mL/h}$                               | 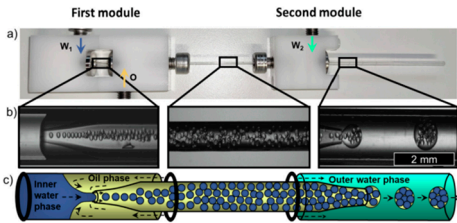   | [31] |
|                | <i>Outer phase:</i><br>glycerol (25% w/w) in distilled water      | <i>Inner phase:</i> Na-alginate (1.5 %wt)<br><i>Middle phase:</i><br>silicon oil                                                           | Span 80 (0.25% w/w) in middle phase.<br>PVA (5% w/w) in outer phase | PDMS microfluidic device  | $Q_i = 50 \mu\text{L/h}$ .<br>$Q_m = 500 \mu\text{L/h}$<br>$Q_o = 20000 - 100000 \mu\text{L/h}$                    |                                                                                       | [32] |
|                | <i>Outer phase:</i><br>aqueous surfactant solution                | <i>Middle phase:</i><br>phenylmethyl silicone oil and silicone resin RSN-0749<br><i>Inner phase:</i><br>glycerol, PVA, and water           | PVA (5 wt%) in outer and inner phases.                              | Glass microfluidic device | $Q_i = 150 \text{ mL/h}$<br>$Q_m = 150-1750 \text{ mL/h}$<br>$Q_o = 1 \text{ mL/h}$                                |    | [33] |
|                | <i>Outer phase:</i><br>glycerol (40 wt%) and surfactant           | <i>Inner phase:</i><br>glycerol (5 %wt) and surfactant<br><i>Middle phase:</i> XIA-METER® RSN-0749 resin in Dow Corning® 200 fluid (2 wt%) | Hydrophilic: PVA<br>Lipophilic: XIAMETER® RSN-074                   | Glass microfluidic device |                                                                                                                    |   | [34] |
| O/W/O emulsion | <i>Outer phase 1 and 2:</i> oil solution containing PGPR (4% w/v) | <i>Inner phase:</i><br>poly(ethylene glycol) diacrylate (PEGDA; 50 %wt), 2-Hydroxy-methylpropio-phen one (HMPP; 5 %wt), and surfactant     | Pluronic® F 127                                                     | Glass microfluidic device | $Q_i = 100-900 \mu\text{L/h}$<br>$Q_{o1} = 300 \text{ and } 200 \mu\text{L/h}$<br>$Q_{o2} = 500-800 \mu\text{L/h}$ |  | [35] |

|  |                                                                        |                                                                                                                                                                                |                                                                                                                                               |                                    |                                                                                                   |                                                                                       |      |
|--|------------------------------------------------------------------------|--------------------------------------------------------------------------------------------------------------------------------------------------------------------------------|-----------------------------------------------------------------------------------------------------------------------------------------------|------------------------------------|---------------------------------------------------------------------------------------------------|---------------------------------------------------------------------------------------|------|
|  |                                                                        |                                                                                                                                                                                |                                                                                                                                               |                                    |                                                                                                   |                                                                                       |      |
|  | Outer phase:<br>dimethicone                                            | Inner phase:<br>silicone oil.<br>Middle phase:<br>surfactant                                                                                                                   | PVA (2 % w/w) in<br>the middle phase                                                                                                          | Photosensitive<br>resin Gr and HIT | $Q_i = Q_m = 2 \text{ mL/h}$<br>$Q_c = 5 \text{ mL/h}$                                            | 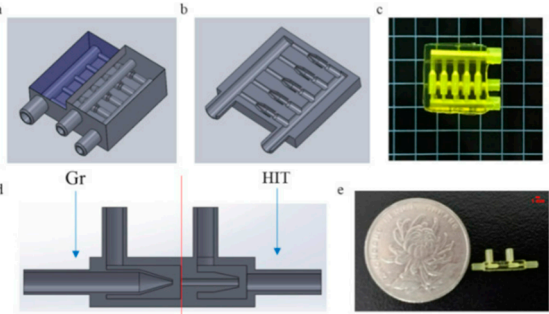   | [27] |
|  | Outer phase:<br>sunflower oil and<br>glacial acetic acid<br>(0.1% w/w) | O/W emulsion<br>prepared by<br>ultrasound: Na-<br>alginate (1%<br>(w/w)) and $\text{CaCO}_3$<br>(0.1825 g/g of Na-<br>alginate), cellulose<br>nanocrystal and<br>sunflower oil | PGPR (4 wt%)                                                                                                                                  | Glass microfluidic<br>device       | $Q_c = 3000 - 15000 \mu\text{L/h}$ .<br>$Q_d = 600-3000 \mu\text{L/h}$                            |    | [36] |
|  | Outer phase:<br>silicone oil                                           | Inner phase:<br>silicone oil.<br>Middle phase:<br>glycerol (25%<br>(w/w))                                                                                                      | Span 80 (0.25%<br>w/w) in the inner<br>phase.<br>PVA (10 % w/w)<br>and in the middle<br>phase.<br>Span 80 (2.5%<br>w/w) in the outer<br>phase | PDMS<br>microfluidic<br>device     | $Q_i = 50 \mu\text{L/h}$ .<br>$Q_m = 500 \mu\text{L/h}$<br>$Q_o = 20,000 - 100,000 \mu\text{L/h}$ |   | [32] |
|  | Outer phase:<br>orange oil                                             | Inner phase:<br>middle chain<br>triglyceride (MCT).<br>Middle phase:<br>PVA (1% w/v) in<br>water                                                                               | PVA in water and<br>PGPR in MCT                                                                                                               | Glass microfluidic<br>device       | $Q_o = 50-400 \text{ mL/h}$<br>$Q_m = 4-14 \text{ mL/h}$<br>$Q_i = 1-5 \text{ mL/h}$              |  | [31] |

\* PVA: polyvinyl alcohol; PGPR: polyglycerol polyricinoleate; Span 20: sorbitan monooleate; PDMS: polydimethylsiloxane.

# References

1. Dolomite Microfluidics, 2022 Dolomite Microfluidics, URL: <https://www.dolomite-microfluidics.com/>, 29 January 2022.
2. microfluidic ChipShop, 2022 Microfluidic ChipShop, URL: <https://www.microfluidic-chipshop.com/>, 29 January 2022.
3. Ma, Z.; Zhao, Y.; Khalid, N.; Shu, G.; Neves, M.A.; Kobayashi, I.; Nakajima, M. Comparative Study of Oil-in-Water Emulsions Encapsulating Fucoxanthin Formulated by Microchannel Emulsification and High-Pressure Homogenization. *Food Hydrocoll.* **2020**, *108*, 105977, doi:10.1016/J.FOODHYD.2020.105977.
4. Khalid, N.; Kobayashi, I.; Neves, M.A.; Uemura, K.; Nakajima, M.; Nabetani, H. Microchannel Emulsification Study on Formulation and Stability Characterization of Monodisperse Oil-in-Water Emulsions Encapsulating Quercetin. *Food Chem.* **2016**, *212*, 27–34, doi:10.1016/J.FOODCHEM.2016.05.154.
5. Khalid, N.; Shu, G.; Kobayashi, I.; Nakajima, M.; Barrow, C.J. Formulation and Characterization of Monodisperse O/W Emulsions Encapsulating Astaxanthin Extracts Using Microchannel Emulsification: Insights of Formulation and Stability Evaluation. *Colloids Surfaces B Biointerfaces* **2017**, *157*, 355–365, doi:10.1016/J.COLSURFB.2017.06.003.
6. Zhang, J.; Zhang, R.; Zhang, Y.; Pan, Y.; Shum, H.C.; Jiang, Z. Alginate-Gelatin Emulsion Droplets for Encapsulation of Vitamin A by 3D Printed Microfluidics. *Particuology* **2021**, doi:10.1016/J.PARTIC.2021.09.004.
7. Kim, J.H.; Na, J.; Bak, D.H.; Lee, B.C.; Lee, E.; Choi, M.J.; Ryu, C.H.; Lee, S.; Mun, S.K.; Park, B.C.; et al. Development of Finasteride Polymer Microspheres for Systemic Application in Androgenic Alopecia. *Int. J. Mol. Med.* **2019**, *43*, 2409–2419, doi:10.3892/IJMM.2019.4149/HTML.
8. Kim, S.; Wang, H.; Yan, L.; Zhang, X.; Cheng, Y. Continuous Preparation of Itraconazole Nanoparticles Using Droplet-Based Microreactor. *Chem. Eng. J.* **2020**, *393*, 124721, doi:10.1016/J.CEJ.2020.124721.
9. Vu, H.T.H.; Streck, S.; Hook, S.M.; McDowell, A. Utilization of Microfluidics for the Preparation of Polymeric Nanoparticles for the Antioxidant Rutin: A Comparison with Bulk Production. *Pharm. Nanotechnol.* **2019**, *7*, 469–483, doi:10.2174/2211738507666191019141049.
10. Lorenz, T.; Bojko, S.; Bunjes, H.; Dietzel, A. An Inert 3D Emulsification Device for Individual Precipitation and Concentration of Amorphous Drug Nanoparticles. *Lab Chip* **2018**, *18*, 627–638, doi:10.1039/C7LC01313B.
11. Mou, C.L.; Deng, Q.Z.; Hu, J.X.; Wang, L.Y.; Deng, H.B.; Xiao, G.; Zhan, Y. Controllable Preparation of Monodisperse Alginate Microcapsules with Oil Cores. *J. Colloid Interface Sci.* **2020**, *569*, 307–319, doi:10.1016/J.JCIS.2020.02.095.
12. Michelon, M.; Huang, Y.; de la Torre, L.G.; Weitz, D.A.; Cunha, R.L. Single-Step Microfluidic Production of W/O/W Double Emulsions as Templates for  $\beta$ -Carotene-Loaded Giant Liposomes Formation. *Chem. Eng. J.* **2019**, *366*, 27–32, doi:10.1016/J.CEJ.2019.02.021.
13. Ogończyk, D.; Siek, M.; Garstecki, P. Microfluidic Formulation of Pectin Microbeads for Encapsulation and Controlled Release of Nanoparticles. *Biomicrofluidics* **2011**, *5*, 013405, doi:10.1063/1.3569944.
14. Santos, T.P.; Costa, A.L.R.; Michelon, M.; Costa, L.P.; Cunha, R.L. Development of a Microfluidic Route for the Formation of Gellan-Based Microgels

Incorporating Jabuticaba (*Myrciaria Cauliflora*) Extract. *J. Food Eng.* **2020**, 276, 109884, doi:10.1016/J.JFOODENG.2019.109884.

15. Yu, L.; Sun, Q.; Hui, Y.; Seth, A.; Petrovsky, N.; Zhao, C.X. Microfluidic Formation of Core-Shell Alginate Microparticles for Protein Encapsulation and Controlled Release. *J. Colloid Interface Sci.* **2019**, 539, 497–503, doi:10.1016/J.JCIS.2018.12.075.
16. Ling, K.; Wu, H.; Neish, A.S.; Champion, J.A. Alginate/Chitosan Microparticles for Gastric Passage and Intestinal Release of Therapeutic Protein Nanoparticles. *J. Control. Release* **2019**, 295, 174–186, doi:10.1016/J.JCONREL.2018.12.017.
17. Noh, J.; Kim, J.; Kim, J.S.; Chung, Y.S.; Chang, S.T.; Park, J. Microencapsulation by Pectin for Multi-Components Carriers Bearing Both Hydrophobic and Hydrophilic Active Agents. *Carbohydr. Polym.* **2018**, 182, 172–179, doi:10.1016/J.CARBPOL.2017.11.026.
18. Pagano, A.P.E.; Khalid, N.; Kobayashi, I.; Nakajima, M.; Neves, M.A.; Bastos, E.L. Microencapsulation of Betanin in Monodisperse W/O/W Emulsions. *Food Res. Int.* **2018**, 109, 489–496, doi:10.1016/J.FOODRES.2018.04.053.
19. Comunian, T.A.; Abbaspourrad, A.; Favaro-Trindade, C.S.; Weitz, D.A. Fabrication of Solid Lipid Microcapsules Containing Ascorbic Acid Using a Microfluidic Technique. *Food Chem.* **2014**, 152, 271–275, doi:10.1016/J.FOODCHEM.2013.11.149.
20. Zhou, J.; Zhai, Y.; Xu, J.; Zhou, T.; Cen, L. Microfluidic Preparation of PLGA Composite Microspheres with Mesoporous Silica Nanoparticles for Finely Manipulated Drug Release. *Int. J. Pharm.* **2021**, 593, 120173, doi:10.1016/J.IJPHARM.2020.120173.
21. Chen, H.; Jia, F.; Zhu, C.; Xu, J.; Hua, X.; Xi, Z.; Shen, L.; Zhao, S.; Cen, L. Controllable Preparation of SB-3CT Loaded PLGA Microcapsules for Traumatic-Brain-Injury Pharmacotherapy. *Chem. Eng. J.* **2018**, 339, 346–358, doi:10.1016/J.CEJ.2018.01.140.
22. Chen, Z.; Song, S.; Ma, J.; Ling, S. Da; Wang, Y.D.; Kong, T.T.; Xu, J.H. Fabrication of Magnetic Core/Shell Hydrogels via Microfluidics for Controlled Drug Delivery. *Chem. Eng. Sci.* **2022**, 248, 117216, doi:10.1016/J.CES.2021.117216.
23. Manickam, S.; Sivakumar, K.; Pang, C.H. Investigations on the Generation of Oil-in-Water (O/W) Nanoemulsions through the Combination of Ultrasound and Microchannel. *Ultrason. Sonochem.* **2020**, 69, 105258, doi:10.1016/J.ULTSONCH.2020.105258.
24. Nehme, R.; Blel, W.; Montillet, A.; Bellettre, J.; Marchal, L. Production of Oil in Water Emulsions in Microchannels at High Throughput: Evaluation of Emulsions in View of Cosmetic, Nutraceutical or Pharmaceutical Applications. *Chem. Eng. Process. - Process Intensif.* **2021**, 161, 108301, doi:10.1016/J.CEP.2021.108301.
25. Taarji, N.; Vodo, S.; Bouhoute, M.; Khalid, N.; Hafidi, A.; Kobayashi, I.; Neves, M.A.; Isoda, H.; Nakajima, M. Preparation of Monodisperse O/W Emulsions Using a Crude Surface-Active Extract from Argan by-Products in Microchannel Emulsification. *Colloids Surfaces A Physicochem. Eng. Asp.* **2020**, 585, 124050, doi:10.1016/J.COLSURFA.2019.124050.
26. Kim, C.M.; Choi, H.J.; Park, E.J.; Kim, G.M. Repeated Geometrical T-Junction Breakup Microfluidic Filter Device by Injection of Premixed Emulsion for Microdroplet Production. *J. Ind. Eng. Chem.* **2020**, 81, 81–87, doi:10.1016/J.JIEC.2019.08.055.
27. Zhang, J.; Xu, W.; Xu, F.; Lu, W.; Hu, L.; Zhou, J.; Zhang, C.; Jiang, Z. Microfluidic Droplet Formation in Co-Flow Devices Fabricated by Micro 3D Printing. *J. Food Eng.* **2021**, 290, 110212, doi:10.1016/J.JFOODENG.2020.110212.

28. Jurinjak Tušek, A.; Jurina, T.; Čulo, I.; Valinger, D.; Gajdoš Kljusurić, J.; Benković, M. Application of NIRs Coupled with PLS and ANN Modelling to Predict Average Droplet Size in Oil-in-Water Emulsions Prepared with Different Microfluidic Devices. *Spectrochim. Acta Part A Mol. Biomol. Spectrosc.* **2022**, *270*, 120860, doi:10.1016/J.SAA.2022.120860.
29. Lacroix, A.; Hayert, M.; Bosc, V.; Menut, P. Batch versus Microfluidic Emulsification Processes to Produce Whey Protein Microgel Beads from Thermal or Acidic Gelation. *J. Food Eng.* **2022**, *312*, 110738, doi:10.1016/J.JFOODENG.2021.110738.
30. Keller, S.; Dekkers, R.; Hu, G.X.; Tollemeto, M.; Morosini, M.; Keskin, A.; Wilson, D.A. A Simple Microfluidic Tool to Design Anisotropic Microgels. *React. Funct. Polym.* **2021**, *167*, 105012, doi:10.1016/J.REACTFUNCTPOLYM.2021.105012.
31. Leister, N.; Vladislavljević, G.T.; Karbstein, H.P. Novel Glass Capillary Microfluidic Devices for the Flexible and Simple Production of Multi-Cored Double Emulsions. *J. Colloid Interface Sci.* **2022**, *611*, 451–461, doi:10.1016/J.JCIS.2021.12.094.
32. Sattari, A.; Hanafizadeh, P.; Keshtiban, M.M. Microfluidic Preparation of Double Emulsions Using a High Aspect Ratio Double Co-Flow Device. *Colloids Surfaces A Physicochem. Eng. Asp.* **2021**, *628*, 127297, doi:10.1016/J.COLSURFA.2021.127297.
33. Zhang, K.; Ren, Y.; Jiang, T.; Jiang, H. Thermal Field-Actuated Multifunctional Double-Emulsion Droplet Carriers: On-Demand Migration, Core Release and Released Particle Focusing. *Chem. Eng. J.* **2022**, *431*, 134200, doi:10.1016/J.CEJ.2021.134200.
34. Bandulasena, M. V.; Vladislavljević, G.T.; Benyahia, B. Versatile Reconfigurable Glass Capillary Microfluidic Devices with Lego® Inspired Blocks for Drop Generation and Micromixing. *J. Colloid Interface Sci.* **2019**, *542*, 23–32, doi:10.1016/J.JCIS.2019.01.119.
35. Cai, Q.W.; Ju, X.J.; Chen, C.; Faraj, Y.; Jia, Z.H.; Hu, J.Q.; Xie, R.; Wang, W.; Liu, Z.; Chu, L.Y. Fabrication and Flow Characteristics of Monodisperse Bullet-Shaped Microparticles with Controllable Structures. *Chem. Eng. J.* **2019**, *370*, 925–937, doi:10.1016/J.CEJ.2019.03.221.
36. Dias Meirelles, A.A.; Rodrigues Costa, A.L.; Michelon, M.; Viganó, J.; Carvalho, M.S.; Cunha, R.L. Microfluidic Approach to Produce Emulsion-Filled Alginate Microgels. *J. Food Eng.* **2022**, *315*, 110812, doi:10.1016/J.JFOODENG.2021.110812.
